1 **Early Life Domains as Predictors of Obesity and Hypertension Comorbidity: Findings**  
2 **from the 1970 British Cohort Study (BCS70)**

3

4 S Stannard<sup>1</sup>(ORCID: 0000-0002-6139-1020), RK Owen<sup>2</sup> (ORCID: 0000-0001-5977-376X),  
5 A Berrington<sup>3</sup> (ORCID: 0000-0002-1683-6668), N Ziauddeen<sup>1</sup> (ORCID: 0000-0002-8964-  
6 5029), SDS Fraser<sup>1</sup> (ORCID: 0000-0002-4172-4406), S Paranjothy<sup>4</sup>, RB Hoyle<sup>5</sup> (ORCID:  
7 0000-0002-1645-1071), N A Alwan<sup>1,6,7</sup> (ORCID: 0000-0002-4134-8463)

8

9 <sup>1</sup>School of Primary Care, Population Sciences and Medical Education, Faculty of Medicine,  
10 University of Southampton, Southampton, United Kingdom

11 <sup>2</sup>Population Data Science, Swansea University Medical School, Faculty of Medicine, Health  
12 & Life Science, Swansea University, Swansea, United Kingdom

13 <sup>3</sup>School of Economic, Social and Political Sciences, University of Southampton,  
14 Southampton, United Kingdom

15 <sup>4</sup>School of Medicine, Medical Sciences and Nutrition, University of Aberdeen

16 <sup>5</sup>School of Mathematical Sciences, University of Southampton, Southampton, United  
17 Kingdom

18 <sup>6</sup>University Hospital Southampton NHS Foundation Trust, Southampton, United Kingdom

19 <sup>7</sup>NIHR Applied Research Collaboration Wessex, Southampton, United Kingdom

20

21 Corresponding Author:

22 Sebastian Stannard - [S.J.Stannard@soton.ac.uk](mailto:S.J.Stannard@soton.ac.uk)

23 University of Southampton, University Road, Southampton, SO17 1BJ, United Kingdom

24 +44(0)23 8059 5000

25

26 **Abstract**

27

28 **Background:** Obesity and hypertension are major public health problems and are associated  
29 with adverse health outcomes. To model realistic prevention scenarios and inform policy, it  
30 may be helpful to conceptualise early lifecourse domains of risk and incorporate such  
31 information when predicting comorbidity outcomes. We identify exposures across five pre-  
32 hypothesised childhood domains and explore them as predictors of obesity and hypertension  
33 comorbidity in adulthood.

34 **Methods:** The analytical sample included 7858 participants in the 1970 British Cohort Study.  
35 The outcome was obesity (BMI of  $\geq 30$ ) and hypertension (blood pressure  $> 140/90$  mm Hg or  
36 self-reported doctor's diagnosis) comorbidity at age 46. Early life domains included:  
37 'prenatal, antenatal, neonatal and birth', 'developmental attributes and behaviour', 'child  
38 education and academic ability', 'socioeconomic factors' and 'parental and family  
39 environment'. We conducted prediction analysis of the outcome in three stages: (1) stepwise  
40 backward elimination to select variables for inclusion for each domain (2) calculation of  
41 predicted risk scores of obesity-hypertension for each cohort member within each domain (3)  
42 multivariable logistic regression analysis including domain-specific risk scores, sex and  
43 ethnicity to assess how well the outcome could be predicted. We additionally included  
44 potential adult predictors of obesity-hypertension comorbidity as sensitivity analysis.

45 **Results:** Including all domain-specific risk scores in the same model, all five domains were  
46 significant predictors of obesity-hypertension comorbidity. The predictive power of the  
47 model, measured by the area under the curve (AUC), was 0.63 (95% CI 0.61-0.65). Including  
48 adult predictors increase the AUC to 0.68 (95% CI 0.66-0.70), and three early life domains -  
49 the parental and family environment domain (OR 1.11 95% CI 1.05-1.17) the socioeconomic

50 factors domain (OR 1.09 95%CI 1.04-1.16), and the education and academic ability domain  
51 (OR 1.07 95%CI 1.02-1.13) remained predictors of obesity-hypertension comorbidity.

52 **Conclusions:** We found three robust domains for predicting obesity-hypertension  
53 comorbidity. Interventions that address these early life factors could reduce the burden of  
54 comorbidity.

55

## 56 **Introduction**

57 Obesity and hypertension are major public health problems [1-2]. In England, 26% of adults  
58 have obesity [3], and 30% of adults have hypertension [4]. Both conditions are associated  
59 with morbidities later in the lifecourse, including Type 2 diabetes, heart disease, kidney  
60 disease, renal disease, strokes, and some cancers, including breast and bowel cancer [5-8].  
61 There is evidence suggesting that in England and Scotland since 2014, obesity and excess  
62 body fat have contributed to more deaths among people in middle- and old-age than smoking  
63 [9]. On a global level, in 2019 and across 204 countries, the leading Level 2 risk factor for  
64 attributable deaths was high systolic blood pressure, and between 2010 to 2019, one of the  
65 largest increases in risk exposure was for high body-mass index [10].

66

67 Obesity and hypertension are closely related and often co-occur [11], for example each  
68 condition occurs at higher frequency with the other than in a population free of either [12].  
69 Research indicates that obesity accounts for 60-70% of hypertension, and individuals with  
70 obesity are 3.5 times more likely to have hypertension compared to normal weight  
71 individuals [13,14]. The combination of both conditions significantly increases the likelihood  
72 of adverse health outcomes such as cardiovascular disease, reduced sexual function, quality  
73 of life and mortality [12,15,16]. Previous literature has also identified obesity and

74 hypertension as common sentinel conditions, defined as the first long-term condition in the  
75 development of multiple long-term conditions [17-20].

76

77 A substantial body of evidence suggests that experiences in early life are crucial in  
78 determining outcomes such as obesity and hypertension. The aetiology of chronic disease has  
79 been strongly linked with environmental exposures in utero and early life [21].

80 Socioeconomic disadvantage in early life is also strongly related to obesity and hypertension  
81 [22]. Analyses of the Hertfordshire cohort study demonstrated that paternal social class was  
82 associated with future multimorbidity, including hypertension [23]. In the Aberdeen Children  
83 of the 1950s cohort, lower father's social class at birth was associated with early-onset  
84 multimorbidity, including hypertension [24], and in the 1970 British Cohort Study those with  
85 fathers from unskilled occupational groups (vs. professional) at birth had 43% higher risk of  
86 early-onset (age 46-48) multimorbidity including hypertension [25].

87

88 Many wider determinants acting in childhood are likely to increase the risk of disease in  
89 adulthood, and in previous research [26,27] we conceptualised exposures across 12 pre-  
90 defined childhood domains covering a range of social, economic, developmental, educational  
91 and environmental factors. Most previous research focuses on single exposure-outcome  
92 relationships, potentially to reduce statistical complexity, or to focus policy attention onto a  
93 specific aspect. However, focussing on single exposures does not reflect the reality and  
94 complexity of the early life course given children are likely to be exposed to combinations of  
95 intersectional factors across these domains, often simultaneously. We argue that analyses  
96 must begin to explore exposures as domains (i.e., a group of variables that represent an  
97 overarching theme) rather than the individual variables that form its components for three  
98 reasons. First, to provide a combined exposure measure that reflects multiple variables in the

99 data rather than performing multiple statistical testing using all of the components in relation  
100 to the study outcomes. Second, to conceptualise the components within wider early life  
101 domains provides a better reflection of the childhood conditions in which people grow up.  
102 Third considering domains will better inform interventions and policy in childhood as  
103 incorporating information from multiple early life domains into the same analysis may help  
104 us understand the combined effects of different experiences across a range of early life  
105 domains on developing long-term conditions. This can provide actionable insights into  
106 developing complex multi-domain interventions in childhood that may help support people to  
107 live more healthily for longer across the lifecourse.

108

109 In this paper we look to address two research questions. Firstly, which early life domain(s)  
110 contribute to predicting the risk of obesity-hypertension comorbidity at mid-life? Secondly,  
111 which early life domain(s) are more important than others in explaining the variability in  
112 obesity-hypertension occurrence?

113

114 To achieve this, we aimed to predict the outcome of obesity-hypertension comorbidity using  
115 five early lifecourse domains. In order to do this while weighting the components of each  
116 domain, we also aimed to produce -as a first stage of the analysis- predicted risk scores of the  
117 outcome for each of the five pre-defined early life domains [26,27]. In a sensitivity analysis  
118 we included potential adult risk factors of obesity-hypertension comorbidity (number of days  
119 of exercise per week, highest educational qualification, weekly income, number of cigarettes  
120 smoked daily, hours spent on a weekday watching television, hours on a weekday spent on  
121 the internet (not for work related reasons), cohabitating with a partner, alcohol consumption  
122 and use of e-cigarettes) to explore which early life domains matter most for obesity-  
123 hypertension comorbidity taking account of such factors.

124

125 This work forms part of a larger aim to model targeted multimorbidity prevention scenarios  
126 as part of the Multidisciplinary Ecosystem to study Lifecourse Determinants and Prevention  
127 of Early-onset Burdensome Multimorbidity (MELD-B) project [28].

128

## 129 **Methods**

### 130 ***Dataset***

131 We used the 1970 British Cohort Study (BCS70) [29] that has followed 17196 cohort  
132 members in England, Scotland, Wales born in one week in 1970; to date, there have been 10  
133 sweeps of data collection – 4 in childhood and 6 in adulthood. The comorbidity outcome of  
134 obesity and hypertension was measured at age 46 within a biomedical sweep with  
135 measurements conducted by a research nurse. All other variables were collected either at  
136 birth or age 10.

137

### 138 ***Outcome***

139 The outcome was a combined obesity-hypertension phenotype at age 46. Blood pressure was  
140 measured via three systolic and diastolic blood pressure readings during a single appointment  
141 and administered by a research nurse. Hypertension was defined as an average blood pressure  
142 reading of over 140/90 mm Hg. We additionally classified hypertension if a participant  
143 reported (at age 46) that they had received a doctor's diagnosis of high blood pressure or  
144 hypertension, even if the blood pressure measurement was less than 140/90 mm Hg, since  
145 diagnosed hypertension may be accompanied by intake of antihypertensive medication, thus  
146 lowering blood pressure readings at the time of cohort measurement. Body mass index (BMI)  
147 was calculated via height and weight measurements taken during the same nurse appointment  
148 using the following formula:  $BMI = \text{weight (kg)} / \text{height (m)}^2$ . Obesity was defined as a BMI

149 of 30 or over. The obesity-hypertension comorbidity variable was considered as a binary  
150 (no/yes) variable.

151

### 152 *Exposures (Five pre-hypothesised domains)*

153 We previously conceptualised 12 domains of early life risk factors of future multimorbidity  
154 risk informed through a scoping literature/policy review and patient and public engagement  
155 [26]. In this paper we focus our analysis on 5 out of the 12 domains chosen because they  
156 showed unadjusted associations with the outcomes:

- 157 1. *Prenatal, antenatal, neonatal and birth domain* focused on the period from  
158 conception to the onset of labour, the circumstances and outcomes surrounding a  
159 birth, and the period immediately following birth.
- 160 2. *Developmental attributes and behaviour domain* focused on the developmental  
161 markers of children relating to cognition, coordination, personality types and  
162 behavioural traits.
- 163 3. *Child education and academic ability domain* related to the process of learning and  
164 educational achievement, especially in educational settings, and the knowledge an  
165 individual gains from these educational institutions.
- 166 4. *Socioeconomic factors domain* included factors relating to differences between  
167 individuals or groups of peoples caused mainly by their social and economic situation.
- 168 5. *Parental and family environment domain* incorporated the interactions between  
169 children and care givers, parenting styles, parental beliefs, attitudes and discipline,  
170 and wider family factors such as kin networks.

171 Supplementary Materials Table 1 includes all the variables that were initially considered  
172 for each domain. These variables were selected and categorised based on a previous data  
173 audit and PCA analysis [27] that identified early-life variables from multiple sweeps of

174 data that fitted into five early-life domains of future multimorbidity risk. This previous  
175 work reduced the dimensionality of the data and structured each of the five domains into  
176 mutually exclusive groups of variables based on similar characteristics [27].

177

### 178 *Analytical sample*

179 The analytical sample included all cohort members who had measured BMI and blood  
180 pressure at age 46 (n = 7858); this represented 45.7% of the original birth cohort. To preserve  
181 sample size and reduce bias in the estimates due to missing data we used multiple imputation.  
182 Multiple imputation was conducted by chained equations for missing observations at birth,  
183 age 10, and 46 [30]. 50 imputation cycles were constructed under the missing-at-random  
184 assumption [31-33], which has been found to be highly plausible in the British birth cohorts  
185 [34]. All variables were included in the imputation process. The outcome was included in the  
186 imputed models, but imputed outcome values were not used. For reference we include results  
187 based on complete case analysis in Supplementary Materials Tables 2 and 9.

188

### 189 **Statistical analysis**

190 *Step 1: Stepwise backwards elimination to select variables for inclusion separately for each*  
191 *domain.*

192 Firstly, stepwise backward elimination conducted on multiple imputed data, was used to  
193 select variables for inclusion separately for each domain. This method started with all  
194 potential variables identified for each domain as outlined in Supplementary Materials Table  
195 1, then variables were removed sequentially based on a series of hypothesis tests. In  
196 backward elimination, variables were removed sequentially if the p-value for a variable  
197 exceeded the specified significance level which was set at 0.157. This level was chosen  
198 conservatively to reduce the risk of overfitting and is the equivalent to the Akaike



199 information criterion (AIC) [35,36]. Table 1 identifies the retained variables following  
200 stepwise backwards elimination for each domain in relation to the outcome of obesity-  
201 hypertension comorbidity at age 46, the descriptive statistics were based on the specific  
202 sample available at the sweep in which the variable was reported or measured.

203

204 *Step 2: Predicted risk scores of obesity-hypertension comorbidity for each cohort member*  
205 *within each domain.*

206 Secondly, logistic regression models then explored the relationship between retained  
207 variables within each domain following stepwise backwards elimination and odds of obesity-  
208 hypertension comorbidity. Based on this logistic regression modelling, and using the ‘predict’  
209 function in STATA [37], predicted risk scores of the obesity-hypertension comorbidity  
210 outcome for each cohort member within each domain were calculated. In other words, each  
211 cohort member has five predicted score values in relation to the obesity-hypertension  
212 comorbidity outcome, one for each of the five domains. These predicted risk scores for each  
213 individual, and within each domain, were centred on the mean predicted risk score within that  
214 domain, and were bound between -1 and 1. A Pearson correlation matrix then explored the  
215 correlation between domain-specific risk scores. We generated predicted risk scores of  
216 obesity-hypertension for each of the five early life domains to account for the weight of each  
217 domain component in relation to the outcome rather than assuming each component  
218 contributes an equal weight to the outcome.

219

220 *Step 3: A prediction model including five domain-specific risk scores.*

221 The third step involved focussing on how well obesity-hypertension could be predicted  
222 including all five domain-specific risk scores produced in step 2 using a multivariable logistic  
223 regression model with the ‘predict function’, and adding sex (at birth) and ethnicity. We

224 produced the area under curve (AUC) statistic to assess the predictive performance of this  
225 model. Odds ratios and confidence intervals of the five domains within this model were used  
226 to identify the strongest domains that acted as predictors for obesity and hypertension  
227 comorbidity taking into account the effect of the other domains.

228

229 *Step 4: A prediction model including five domain-specific risk scores and adult factors*  
230 *(sensitivity analyses)*

231 The fourth step involved performing step 3 with the inclusion of adult factors that are  
232 potentially linked to both the exposures and the outcome. These were recorded at age 46  
233 including number of days of exercise per week, highest educational qualification,  
234 occupational social class, weekly income, number of cigarettes smoked daily, hours spent on  
235 a weekday watching television, hours on a weekday spent on the internet (not for work  
236 related reasons), cohabitating with a partner, alcohol consumption and use of e-cigarettes.

237

## 238 **Ethical considerations**

239 Ethics approval for the MELD-B project has been obtained from the University of  
240 Southampton Faculty of Medicine Ethics committee (ERGO II Reference 66810).

241

## 242 **Results**

243 *Step 1: Stepwise backwards elimination to select variables for inclusion in each domain.*

244 Among the 7858 cohort members at age 46, 597 (7.6%) had obesity-hypertension  
245 comorbidity at age 46. Table 1 identifies the retained variables following stepwise backwards  
246 elimination for each domain in relation to the outcome of obesity-hypertension comorbidity  
247 at age 46. As shown in Table 1, in the socioeconomic factors domain, 9.2% of cohort  
248 members whose gross family income at age 10 (per week) was below £49 had obesity-

249 hypertension at age 46, compared to 4.2% of cohort members whose gross family income  
 250 was above £250. In the prenatal, antenatal, neonatal domain, 8.8% of cohort members whose  
 251 mothers smoked during pregnancy had obesity and hypertension at age 46 compared to a  
 252 6.7% prevalence in non-smokers. In the education and academic ability domain 10.1% of  
 253 cohort members who reported some difficulty with reading at age 10 had obesity-  
 254 hypertension at age 46 compared to a prevalence of 7.1% in those with no difficulty. Finally,  
 255 for the parent and family environment domain of cohort members with a father by adoption  
 256 (10.4%), stepfather (10.3%) or another father figure such as a grandparent (11.2%) at age 10  
 257 had obesity-hypertension at age 46 compared to 7.4% in those living with a biological father.  
 258  
 259 *Table 1. Step 1: Variables retained in the five domains risk scores following stepwise*  
 260 *backwards elimination, and the prevalence of obesity-hypertension comorbidity at age 46.*

|                                                                              |                                           |                    | Obesity and High Blood Pressure |               |                     |
|------------------------------------------------------------------------------|-------------------------------------------|--------------------|---------------------------------|---------------|---------------------|
|                                                                              |                                           |                    | No                              | Yes           | Total               |
|                                                                              |                                           |                    | N (%)                           | N (%)         | Sample <sup>1</sup> |
| Prenatal, antenatal, neonatal and birth domain (variables recorded at birth) | Mother's parity at birth of cohort member | 0                  | 2849<br>(91.9%)                 | 251<br>(8.1%) | 3100                |
|                                                                              |                                           | 1                  | 2475<br>(93.1%)                 | 183<br>(6.9%) | 2658                |
|                                                                              |                                           | 2                  | 1127<br>(92.7%)                 | 89<br>7.3%    | 1216                |
|                                                                              |                                           | 3                  | 460<br>(93.1%)                  | 34<br>(6.9%)  | 494                 |
|                                                                              |                                           | 4                  | 201<br>(89.3%)                  | 24<br>(10.7%) | 225                 |
|                                                                              | 5+                                        | 148<br>(89.7%)     | 17<br>(10.3%)                   | 165           |                     |
| Maternal smoking during pregnancy                                            |                                           | Non-smoker         | 3190<br>(93.3%)                 | 229<br>(6.7%) | 3419                |
|                                                                              |                                           | Stopped pre/during | 1272<br>(92.8%)                 | 993<br>(7.2%) | 1371                |

|                                                                                     |                                                           |                                         |                 |                 |      |
|-------------------------------------------------------------------------------------|-----------------------------------------------------------|-----------------------------------------|-----------------|-----------------|------|
|                                                                                     |                                                           | Smoker                                  | 2758<br>(91.2%) | 266<br>(8.8%)   | 3024 |
|                                                                                     | Birthweight                                               | No obesity-hypertension -<br>mean (SD)  |                 | 3318g<br>(523g) | 7254 |
|                                                                                     |                                                           | Yes obesity-hypertension -<br>mean (SD) |                 | 3246g<br>(483g) | 596  |
|                                                                                     | Maternal age at birth<br>of cohort member                 | No obesity-hypertension -<br>mean (SD)  |                 | 26.0<br>(5.3)   | 7220 |
|                                                                                     |                                                           | Yes obesity-hypertension -<br>mean (SD) |                 | 25.6<br>(5.6)   | 594  |
| Education and<br>academic ability<br>domain<br>(variables<br>recorded at age<br>10) | Ability spelling –<br>cohort member’s<br>assessment       | Good ability                            | 3210<br>(93.2%) | 234<br>(6.9%)   | 3444 |
|                                                                                     |                                                           | Poor ability                            | 2605<br>(91.0%) | 258<br>(9.0%)   | 2863 |
|                                                                                     | Difficulty writing –<br>teacher’s assessment              | No difficulty                           | 5173<br>(92.9%) | 396<br>(7.1%)   | 5569 |
|                                                                                     |                                                           | Some difficulty                         | 1050<br>(90.2%) | 114<br>(9.8%)   | 1164 |
|                                                                                     |                                                           | Great difficulty                        | 127<br>(94.8%)  | 7<br>(5.2%)     | 134  |
|                                                                                     | Difficulty reading –<br>teacher’s assessment              | No difficulty                           | 5260<br>(92.9%) | 402<br>(7.1%)   | 5662 |
|                                                                                     |                                                           | Some difficulty                         | 950<br>(89.9%)  | 107<br>(10.1%)  | 1057 |
|                                                                                     |                                                           | Great difficulty                        | 161<br>(93.6%)  | 11<br>(6.4%)    | 172  |
|                                                                                     | Edinburgh Reading<br>Test Scores                          | No obesity-hypertension -<br>mean (SD)  |                 | 42.5<br>(12.1)  | 5776 |
|                                                                                     |                                                           | Yes obesity-hypertension -<br>mean (SD) |                 | 40.1<br>(12.2)  | 493  |
| Parent and<br>family<br>environment<br>domain<br>(variables<br>recorded at age      | Father interest in<br>education – teacher’s<br>assessment | Very interested                         | 2200<br>(93.6%) | 150<br>(6.4%)   | 2350 |
|                                                                                     |                                                           | Moderate interest                       | 1136<br>(92.1%) | 97<br>(7.8%)    | 1233 |
|                                                                                     |                                                           | Very little interest                    | 178<br>(90.8%)  | 18<br>(9.2%)    | 196  |

|                                                     |                          |                 |                 |               |
|-----------------------------------------------------|--------------------------|-----------------|-----------------|---------------|
| 10)                                                 | Uninterested             | 144<br>(92.3%)  | 12<br>(7.7%)    | 156           |
|                                                     | Cannot say/no father     | 1658<br>(90.6%) | 172<br>(9.5%)   | 1830          |
| Mother interest in education – teacher’s assessment | Very interested          | 3058<br>(93.2%) | 203<br>(6.8%)   | 3281          |
|                                                     | Moderate interest        | 1694<br>(91.8%) | 151<br>(8.2%)   | 1845          |
|                                                     | Very little interest     | 242<br>(90.3%)  | 26<br>(9.7%)    | 268           |
|                                                     | Uninterested             | 99<br>(90.8%)   | 10<br>(9.2%)    | 109           |
|                                                     | Cannot say/no mother     | 636<br>(89.5%)  | 75<br>(10.6%)   | 711           |
|                                                     | Family go on outings     | Often           | 3570<br>(92.7%) | 281<br>(7.3%) |
|                                                     | Sometimes                | 2602<br>(91.9%) | 229<br>(8.1%)   | 2831          |
|                                                     | Rarely or never          | 216<br>(92.7%)  | 17<br>(7.3%)    | 233           |
| Father helps manage cohort member                   | Equal or similar amount  | 3346<br>(92.1%) | 287<br>(7.9%)   | 3633          |
|                                                     | Smaller part than mother | 2118<br>(93.2%) | 154<br>(6.8%)   | 2272          |
|                                                     | Very small part          | 437<br>(92.4%)  | 36<br>(7.6%)    | 473           |
|                                                     | Does not help            | 442<br>(91.1%)  | 43<br>(8.9%)    | 485           |
| Father Figure                                       | Biological father        | 5584<br>(92.7%) | 440<br>(7.4%)   | 6024          |
|                                                     | Father by adoption       | 86<br>(89.6%)   | 10<br>(10.4%)   | 96            |
|                                                     | Step father              | 235<br>(89.7%)  | 27<br>(10.3%)   | 262           |
|                                                     | Other                    | 111<br>(88.8%)  | 14<br>(11.2%)   | 125           |

|                                                                                                |                                      |                                         |                 |                  |      |
|------------------------------------------------------------------------------------------------|--------------------------------------|-----------------------------------------|-----------------|------------------|------|
|                                                                                                |                                      | No father figure                        | 415<br>(91.6%)  | 38<br>(8.4%)     | 453  |
| Developmental<br>attributes and<br>behaviour<br>domain<br>(variables<br>recorded at age<br>10) | Rutter behaviour                     | No obesity-hypertension -<br>mean (SD)  |                 | 424.0<br>(209.2) | 6047 |
|                                                                                                |                                      | Yes obesity-hypertension -<br>mean (SD) |                 | 449.7<br>(196.8) | 497  |
|                                                                                                | Number of steps<br>walking backwards | No obesity-hypertension -<br>mean (SD)  |                 | 15.7<br>(5.4)    | 5975 |
|                                                                                                |                                      | Yes obesity-hypertension -<br>mean (SD) |                 | 15.0<br>(5.6)    | 488  |
|                                                                                                | Hand control rating                  | No obesity-hypertension -<br>mean (SD)  |                 | 30.3<br>(12.2)   | 5815 |
|                                                                                                |                                      | Yes obesity-hypertension -<br>mean (SD) |                 | 28.2<br>(12.2)   | 496  |
| Socioeconomic<br>factors domain<br>(variables<br>recorded at age<br>10)                        | Parental social class                | I professional                          | 439<br>(94.2%)  | 27<br>(5.8%)     | 466  |
|                                                                                                |                                      | II managerial                           | 1691<br>(94.1%) | 106<br>(5.9%)    | 1797 |
|                                                                                                |                                      | III non-manual                          | 710<br>(92.8%)  | 55<br>(7.2%)     | 765  |
|                                                                                                |                                      | III manual                              | 2432<br>(91.5%) | 226<br>(8.5%)    | 2658 |
|                                                                                                |                                      | IV partly skilled                       | 762<br>(89.5%)  | 89<br>(10.5%)    | 851  |
|                                                                                                |                                      | V Unskilled                             | 206<br>(91.9%)  | 18<br>(8.1%)     | 224  |
|                                                                                                | Gross Income per<br>week             | £250+                                   | 408<br>(95.8%)  | 16<br>(4.2%)     | 426  |
|                                                                                                |                                      | £200-£249                               | 421<br>(92.3%)  | 35<br>(7.7%)     | 456  |
|                                                                                                |                                      | £150-£199                               | 1061<br>(94.0%) | 68<br>(6.0%)     | 1129 |
|                                                                                                |                                      | £100-£149                               | 2072<br>(91.7%) | 188<br>(8.3%)    | 2260 |
|                                                                                                |                                      | £50-£99                                 | 1602<br>(91.0%) | 158<br>(9.0%)    | 1760 |

|                |                            |                 |               |      |
|----------------|----------------------------|-----------------|---------------|------|
|                | Under £49                  | 334<br>(90.8%)  | 34<br>(9.2%)  | 368  |
| Housing tenure | Owned outright             | 737<br>(93.1%)  | 55<br>(6.9%)  | 792  |
|                | Private rent               | 191<br>(93.2%)  | 14<br>(6.8%)  | 205  |
|                | Being purchased (mortgage) | 3585<br>(93.0%) | 270<br>(7.0%) | 3855 |
|                | Council rent               | 1685<br>(90.5%) | 177<br>(9.5%) | 1862 |
|                | Other                      | 198<br>(92.1%)  | 17<br>(7.9%)  | 215  |

261 <sup>1</sup>The total sample size was based on the specific sample available at the sweep in which the  
 262 variable was reported or measured.

263

264 *Step 2: Generation of domain-specific predicted risk scores of obesity-hypertension*  
 265 *comorbidity for each cohort member.*

266 Supplementary Materials Figure 1. presents a histogram of the distribution of domain-specific  
 267 predicted risk scores, generated in step 2, following logistic regression modelling that  
 268 explored the relationship between retained variables following stepwise backwards  
 269 elimination (step 1) and obesity-hypertension comorbidity for the five early life domains. In  
 270 Supplementary Materials Tables 4-8, we include the regression coefficients of obesity-  
 271 hypertension for these models, and for each domain separately. The domain risk scores were  
 272 centred on the mean predicted risk score (for each domain) and bound between -1 and 1. As  
 273 shown the largest range of domain predicted risk scores was for the prenatal, antenatal,  
 274 neonatal and birth domain (range -0.05 – 0.14) and the smallest range was for the parental  
 275 and environmental domain risk score (range -0.03 – 0.08).

276

277 Given there was likely to be correlation between domain risk scores, in Supplementary  
278 Materials Table 3 we present a Pearson correlation matrix exploring correlation across  
279 domains. The highest correlation was between both the developmental attributes and  
280 behaviour domain and the child education and academic ability domain (coefficient  
281 0.29), and between the parental and family environment domain and the socioeconomic  
282 factors domain (coefficient 0.32), and therefore the correlation between predicted risk scores  
283 for each domain was low.

284

285 *Step 3: Prediction modelling of obesity-hypertension including five domain-specific risk*  
286 *scores.*

287 We calculated the area under curve (AUC) (included in Supplementary Materials 10) for the  
288 prediction model that included all five domain specific risk scores (produced in step 2),  
289 ethnicity and sex. Overall, the area under the curve was 0.63 (95%CI 0.61-0.65). Table 2  
290 presents the odds ratios of obesity-hypertension at age 46 for the prediction model that  
291 included all five domain specific risk scores (produced in step 2), sex and ethnicity. As  
292 shown, all domain risk scores were significant predictors of obesity-hypertension  
293 comorbidity, with the strongest being the parental and family environment domain (OR 1.11  
294 95%CI 1.05-1.17) and the socioeconomic factors domain (OR 1.11 95%CI 1.05-1.17). The  
295 weakest domain predictors included the prenatal, antenatal, neonatal and birth domain (OR  
296 1.06 95%CI 1.01-1.12) and the education and academic ability domain (OR 1.07 95%CI  
297 1.01-1.12).

298

299 *Table 2. Step 3: Odds ratios of obesity-hypertension at age 46 in relation to domain-specific*  
300 *risk score of obesity-hypertension for five early life domains. Multiple imputed data (50*  
301 *Imputations).*



|                                                | Odds ratios | 95% Confidence interval |
|------------------------------------------------|-------------|-------------------------|
| Developmental attributes and behaviour domain  | <b>1.08</b> | <b>1.03 - 1.15</b>      |
| Prenatal, antenatal, neonatal and birth domain | <b>1.06</b> | <b>1.01 - 1.12</b>      |
| Parent and family environment domain           | <b>1.11</b> | <b>1.05 - 1.17</b>      |
| Education and academic ability domain          | <b>1.07</b> | <b>1.01 - 1.12</b>      |
| Socioeconomic factors domain                   | <b>1.11</b> | <b>1.05 - 1.17</b>      |
| Child's sex: Women (base – men)                | <b>0.77</b> | <b>0.64 - 0.91</b>      |
| Mother ethnic group: Other (base – white)      | 1.05        | 0.69 - 1.61             |
| Number of observations                         |             | 7858                    |

302

303 *Step 4: Prediction modelling of obesity-hypertension comorbidity including five domain-*  
 304 *specific risk scores and potential adult predictors (sensitivity analysis).*

305 Table 3 presents the odds ratios of obesity-hypertension at age 46 for the prediction model  
 306 that included all five domain specific risk scores (produced in step 2) ethnicity, sex and adult  
 307 predictors. Overall the inclusion of adult predictors increased the area under the curve to 0.68  
 308 (95%CI 0.66-0.70) (Supplementary table 11). As shown, after the inclusion of adult  
 309 predictors, the prenatal, antenatal, neonatal and birth domain (OR 1.05 95%CI 0.99-1.11) and  
 310 the developmental attributes and behaviour domains (OR 1.07 95%CI 1.00-1.13) were no  
 311 longer significant predictors of obesity-hypertension comorbidity. The other three domains  
 312 remained significant predictors for obesity and hypertension comorbidity. These domains  
 313 included the parental and family environment domain (OR 1.11 95%CI 1.05-1.17), the  
 314 socioeconomic factors domain (OR 1.09 95%CI 1.04-1.16), and the education and academic  
 315 abilities domain (OR 1.07 95%CI 1.02-1.13).

316

317 *Table 3. Step 3: Odds ratios of obesity-hypertension at age 46 in relation to domain-specific*  
 318 *risk score of obesity-hypertension for five early life domains including adult predictors.*  
 319 *Multiple imputed data (50 Imputations).*

|                                                                 | OR          | 95% Confidence Interval |
|-----------------------------------------------------------------|-------------|-------------------------|
| Developmental attributes and behaviour domain                   | 1.07        | 1.00 - 1.13             |
| Prenatal, antenatal, neonatal and birth domain                  | 1.05        | 0.99 - 1.11             |
| Parent and family environment domain                            | <b>1.11</b> | <b>1.05 - 1.17</b>      |
| Education and academic ability domain                           | <b>1.07</b> | <b>1.02 - 1.13</b>      |
| Socioeconomic factors domain                                    | <b>1.09</b> | <b>1.04 - 1.16</b>      |
| Child's sex: Women (base – men)                                 | <b>0.75</b> | <b>0.62 - 0.91</b>      |
| Mother ethnic group: Other (base – white)                       | 0.89        | 0.58 - 1.37             |
| Number of cigarettes smoked a day                               | 0.99        | 0.98 - 1.01             |
| TV hours per weekday: 1 to 2 hours (base - 1 hour or less)      | <b>1.72</b> | <b>1.24 - 2.39</b>      |
| 2 to 3 hours                                                    | <b>1.46</b> | <b>1.03 - 2.06</b>      |
| 3 to 4 hours                                                    | <b>1.49</b> | <b>1.02 - 2.17</b>      |
| More than 4 hours                                               | <b>1.90</b> | <b>1.26 - 2.86</b>      |
| Internet hours per weekday: 1 to 2 hours (base -1 hour or less) | 1.12        | 0.91 - 1.38             |
| 2 to 3 hours                                                    | <b>1.37</b> | <b>1.04 - 1.80</b>      |
| 3 to 4 hours                                                    | 1.37        | 0.95 - 1.98             |
| More than 4 hours                                               | <b>1.47</b> | <b>1.03 - 2.09</b>      |
| Cohabiting: No (base – yes)                                     | 1.04        | 0.85 - 1.27             |
| Alcohol consumption: Does not drink alcohol (base – normal)     | <b>1.39</b> | <b>1.08 - 1.81</b>      |
| High risk drinking                                              | <b>1.23</b> | <b>1.00 - 1.51</b>      |
| Social class: Lower managerial (base - higher managerial)       | 1.10        | 0.82 - 1.49             |
| Intermediate occupations                                        | 1.12        | 0.77 - 1.63             |
| Small employer                                                  | 0.95        | 0.63 - 1.43             |
| Lower supervisor                                                | 1.04        | 0.71 - 1.55             |
| Semi-routine                                                    | 0.89        | 0.59 - 1.35             |
| Routine                                                         | 0.82        | 0.52 - 1.28             |
| Not stated                                                      | 1.15        | 0.80 - 1.67             |
| Not applicable                                                  | 0.75        | 0.48 - 1.17             |
| Days exercise per week: 1 (base – 0)                            | 0.75        | 0.54 - 1.05             |
| 2                                                               | <b>0.74</b> | <b>0.55 - 0.99</b>      |

|                                                           |             |                    |
|-----------------------------------------------------------|-------------|--------------------|
| 3                                                         | <b>0.74</b> | <b>0.55 - 0.99</b> |
| 4                                                         | <b>0.67</b> | <b>0.47 - 0.97</b> |
| 5                                                         | 0.80        | 0.59 - 1.07        |
| 6                                                         | <b>0.56</b> | <b>0.32 - 0.98</b> |
| 7                                                         | <b>0.54</b> | <b>0.41- 0.72</b>  |
| Educational qualification: GCSE (base - no qualification) | 1.32        | <b>1.06 - 1.64</b> |
| A/AS level                                                | 1.24        | 0.81 - 1.91        |
| Diploma                                                   | 1.39        | 0.99 - 1.95        |
| Degree                                                    | 1.20        | 0.89 - 1.63        |
| Higher degree                                             | 1.01        | 0.58 - 1.75        |
| Weekly income                                             | 1.00        | 0.99 - 1.00        |
| Managing financially: doing all right (base - doing well) | 1.06        | 0.86 - 1.30        |
| Just about getting by                                     | 1.24        | 0.95 - 1.61        |
| Finding it quite difficult                                | <b>1.72</b> | <b>1.16 - 2.53</b> |
| Finding it very difficult                                 | 1.65        | 0.99 - 2.78        |
| E-cigarettes: Previously smoked (base- never smoked)      | 0.97        | 0.62 - 1.39        |
| Occasionally smoke                                        | 1.43        | 0.97 - 2.14        |
| Smoke daily                                               | 0.82        | 0.56 - 1.21        |
| Number of observations                                    |             | 7858               |

320

## 321 **Discussion**

322 Using the BCS70 data, early life domains showed associations with obesity-hypertension  
323 comorbidity at age 46 even after accounting for each other, with the strongest domain  
324 predictors for obesity-hypertension being the parental and family environment domain and  
325 the socioeconomic factors domain. After accounting for adult predictors including number of  
326 days of exercise per week, highest educational qualification, occupational social class,  
327 weekly income, number of cigarettes smoked daily, hours spent on a weekday watching  
328 television, hours on a weekday spent on the internet (not for work related reasons),  
329 cohabitating with a partner, alcohol consumption and use of e-cigarettes, associations with  
330 the outcome for the parental and family environment domain, the socioeconomic factors  
331 domain, and the education and academic abilities domain remained robust.

332

333 In this paper we have quantified the effect of a combination of risk factors in early life in the  
334 shape of life domains on comorbidity outcomes. We recognise that prevention policy choices  
335 are rarely feasible or practical for one isolated risk factor and thinking in terms of domains  
336 may help addressing the early wider determinants of later health. Therefore, our motivation  
337 for this analysis stems from the observation that health research tends to investigate single  
338 exposure-outcome relationships, while children’s experiences across a variety of early  
339 lifecourse behavioural, social, economic and transgenerational domains are intersecting, and  
340 therefore research needs to be able to incorporate information from multiple domains into the  
341 same analysis. However, it is also important that health research reflects on modifiable risk  
342 factors for ill health that focus on both direct and indirect factors including wider systemic  
343 and structural determinants of disease and health inequalities [38].

344

345 Previous research has indicated that early life factors, including environmental exposures in  
346 utero, socioeconomic disadvantage, and father’s occupation are associated to the individual  
347 outcomes considered in this paper [21-25]. We extended this previous work to demonstrate  
348 that combinations of early-life risk factors represented through domains are also associated to  
349 obesity-hypertension comorbidity. In particular our results support research for different  
350 cohort studies including the Hertfordshire cohort study and the Aberdeen Children of the  
351 1950s cohort suggesting that early life socioeconomic disadvantage including paternal social  
352 class and occupational social class are key in shaping multimorbidity [22-25]. We have  
353 demonstrated that this relationship remains even after considering the role of other early life  
354 domains and adult predictors.

355

356 The finding that the parental and family environment domain remains important indicate that  
357 there may be lifelong health impacts stemming from the interaction between children and the  
358 primary care giver, parenting styles, parental beliefs, attitudes and discipline, and wider  
359 family factors such as kin networks in childhood.

360

361 Our results support recent policy directions such as those stated in the 2022 Public Health  
362 Wales report and the 2021 The Best Start for Life report which highlight that the relationship  
363 between the parent and child, between the child's parents, and the family's relationships with  
364 their wider family, are key components of both children's wellbeing and early child  
365 development [39,40]. Additionally, we add to literature that has found parenting and family  
366 support, parenting warmth and parenting styles to be important determinants of psychiatric  
367 comorbidity [41]. These results highlight the importance of current UK policy interventions  
368 and research endeavours such as 'A Better Start', 'Family Hubs' and 'Start for Life'  
369 programmes that aim to give children and families the best start in life [42,43]. Identifying  
370 and supporting vulnerable families to develop parenting skills, ensuring children have a  
371 healthy and safe home environment are all interventions that may reduce multimorbidity in  
372 later life. In addition, continued efforts are needed to address the wider determinants of health  
373 such as income and equitable access to good quality housing and healthy food to support  
374 people to have healthy lives for longer.

375

376 Calculating domain-specific risk scores and using these within the same prediction model  
377 was our approach to reduce dimensionality of the individual variables within the domain,  
378 while weighing their components, preserving the structure of the key domains, and providing  
379 the opportunity to move beyond simple counts of binary variables as an indicator of risk.

380 Additionally, this method was developed building on previous work that derived each  
381 variable (within each domain) into a binary (yes/no) outcome, and then summed these binary  
382 variables to produce domain risk scores that described a count of adversity [44]. A limitation  
383 of this previous approach was that we were required to assume that all variables within each  
384 domain and all domain risk scores carried equal weight, and this was particularly problematic  
385 when we compared the relative importance of each domain adjusting for the other domains.  
386 A further issue was that by deriving variables into a binary indicator we disregarded  
387 information contained within the original data structure and we were required to implement  
388 arbitrary cut-off points. The methods developed here represent an alternative method that  
389 adjusted for the weighting of the individual domain risk scores (in the final prediction  
390 model), whilst maintaining the original data structure of the variables.

391

### 392 **Strengths and limitations**

393 Data from a large cohort study allowed us to capture a wide array of biological, social,  
394 environmental, behavioural and family variables in childhood to represent five early  
395 lifecourse domains. This depth of information would not have been available from most  
396 electronic health care records in either primary or secondary care. The data also afforded the  
397 opportunity to analyse objective measures of both obesity and hypertension.

398

399 However, the cohort is representative of births occurring in Britain in 1970 and as such lacks  
400 ethnic diversity. Additionally, no differentiation was made between the burdensome impact  
401 of different diseases or disease severity to the individual. For example, mild controlled  
402 hypertension or just making the threshold for obesity is unlikely to have the same impact on  
403 an individual's quality of life compared to unmanaged hypertension or clinically severe  
404 obesity (BMI over 40). Further, despite using measured rather than self-reported BMI, the

405 BMI measurement continues to have a risk of overestimating body fat in those who have  
406 muscular builds.

407

408 It is also important to consider the possibility that we have over-adjusted within our models,  
409 resulting in overadjustment bias through adjusting for mediators or colliders [45]. This was  
410 unavoidable given our particular approach to the analysis given our domains were combined  
411 risk factors rather than individual variables. Further, children’s experiences across a variety  
412 of early life course domains are intersecting and we argue that research needs to be able to  
413 incorporate information from multiple domains into the same analysis. We therefore felt it  
414 was important to explore multiple domains simultaneously to attempt to disentangle the  
415 strongest predictor for obesity-hypertension comorbidity. We considered taking a more  
416 traditional, epidemiological approach where we would consider the relationship between a  
417 single domain or a single variable within a domain and odds of obesity-hypertension,  
418 controlling for select individual variables from the other domains. However, the choice of  
419 domain would have been arbitrary, and this method would not have addressed this paper’s  
420 research questions.

421

422 Finally, it is important to expand the methods presented here to consider the relationship to  
423 other multimorbidity clusters and outcomes that develop a more sophisticated understanding  
424 of multimorbidity, including focussing on burdensomeness and complexity. In previous  
425 research [27] we audited the early life variables available in two other cohort datasets. The  
426 data available in these datasets provide the opportunity to validate and compare our results  
427 across cohorts.

428

429 **Conclusions**

430 We found the most robust domains for predicting obesity-hypertension were for the parental  
431 and family environment domain, the socioeconomic factors domain and the education and  
432 academic abilities domain. Developing methods for exploring the multidetermined nature of  
433 combined childhood risk factors for health such as the work presented here, can help to  
434 challenge existing understanding of the aetiology of health, develop new ideas and solutions,  
435 and facilitate improvements in developing and recognising health as a complex and  
436 multidetermined concept from a lifecourse perspective.

437

#### 438 **Conflict of Interest**

439 R.O. is a member of the National Institute for Health and Care Excellence (NICE)  
440 Technology Appraisal Committee, member of the NICE Decision Support Unit (DSU), and  
441 associate member of the NICE Technical Support Unit (TSU). She has served as a paid  
442 consultant to the pharmaceutical industry and international reimbursement agencies,  
443 providing unrelated methodological advice. She reports teaching fees from the Association of  
444 British Pharmaceutical Industry (ABPI). R.H. is a member of the Scientific Board of the  
445 Smith Institute for Industrial Mathematics and System Engineering.

#### 446 **Author Contributions**

447 S.F., N.A., R.H., S.P., R.O., S.S. and A.B. contributed to the conceptualisation of the MELD-  
448 B project. S.S., N.A., and S.F. obtained the datasets. All authors contributed to the  
449 conceptualisation of the paper. S.S., and N.A. led the design and planning of the paper. R.O.  
450 led the design of the statistical analysis. S.S., N.A., A.B., N.Z., R.H., and R.O. supported the  
451 design, planning and reviewing of the statistical analysis. S.S. performed the statistical  
452 analysis with support from N.Z. S.S. prepared all figures and graphs. S.S., and N.A. produced  
453 the initial draft of the manuscript. All authors were involved in editing and reviewing the



454 manuscript, and approved the final manuscript. S.S., N.A., and S.F. take responsibility for the  
455 data and research governance.

#### 456 **Data Availability Statement**

457 The BCS70 datasets generated and analysed in the current study are available from the UK  
458 Data Archive repository (available  
459 here: <http://www.cls.ioe.ac.uk/page.aspx?&siteid=795>).

#### 460 **Acknowledgement**

461 We would like to acknowledge all other members of the MELD-B Consortium, and we thank  
462 the participants of the BCS70 cohort study. We would also like to thank Jack Welch and our  
463 other PPIE colleagues.

#### 464 **References**

- 465 1. National Health Service. Obesity Statistics. 2022.  
466 <https://www.nhs.uk/conditions/obesity/>.
- 467 2. Mills KT, Stefanescu A, & He J,T. Global epidemiology of hypertension. Nat. Rev.  
468 Nephrol. 2020; 16: 223–237.
- 469 3. House of Commons Library. Obesity Statistics. 2023.  
470 [https://commonslibrary.parliament.uk/research-  
471 \[briefings/sn03336/#:~:text=Adult%20obesity%20in%20England,is%20classified%20  
472 \\[as%20%27overweight%27\\]\\(https://commonslibrary.parliament.uk/research-briefings/sn03336/#:~:text=Adult%20obesity%20in%20England,is%20classified%20as%20%27overweight%27\\).\]\(https://commonslibrary.parliament.uk/research-briefings/sn03336/#:~:text=Adult%20obesity%20in%20England,is%20classified%20as%20%27overweight%27\)](https://commonslibrary.parliament.uk/research-briefings/sn03336/#:~:text=Adult%20obesity%20in%20England,is%20classified%20as%20%27overweight%27)
- 473 4. National Health Service Digital. Health Survey for England – Part 2. 2021.  
474 [https://digital.nhs.uk/data-and-information/publications/statistical/health-survey-for-  
475 \[england/2021-part-2/adult-health-hypertension\]\(https://digital.nhs.uk/data-and-information/publications/statistical/health-survey-for-england/2021-part-2/adult-health-hypertension\)](https://digital.nhs.uk/data-and-information/publications/statistical/health-survey-for-england/2021-part-2/adult-health-hypertension)

- 476 5. Wolin KY, Carson K, Colditz GA. Obesity and cancer. *The Oncologist*. 2010; 15:  
477 556–565. pmid:20507889
- 478 6. Eckel RH, Kahn SE, Ferrannini E, Goldfine AB, Nathan DM, Schwartz MW, et al.  
479 Endocrine Society, American Diabetes Association, & European Association for the  
480 Study of Diabetes Obesity and type 2 diabetes: what can be unified and what needs to  
481 be individualized?. *Diabetes Care*. 2011; 34: 1424–1430.
- 482 7. Powell-Wiley TM, Poirier P, Burke LE, Després JP, Gordon-Larsen P, Lavie CJ, et al.  
483 Obesity and Cardiovascular Disease: A Scientific Statement From the American Heart  
484 Association. *Circulation*. 2021; 143: e984–e1010. pmid:33882682
- 485 8. Weldegiorgis, M., Woodward, M. The impact of hypertension on chronic kidney  
486 disease and end-stage renal disease is greater in men than women: a systematic review  
487 and meta-analysis. *BMC Nephrol* 21, 506 (2020).
- 488 9. Ho FK, Celis-Morales C, Petermann-Rocha F, Parra-Soto SL, Lewsey J, Mackay,  
489 D et al. Changes over 15 years in the contribution of adiposity and smoking to  
490 deaths in England and Scotland. *BMC Public Health*. 2021; **21**, 169.  
491 doi:10.1186/s12889-021-10167-3
- 492 10. GBD 2019 Risk Factors Collaborators. Global burden of 87 risk factors in 204  
493 countries and territories, 1990–2019: a systematic analysis for the Global Burden of  
494 Disease Study 2019. *The Lancet*. 2019;396(10258): 1223 – 1249.
- 495 11. Leggio M, Lombardi M, Caldarone E, Severi P, D’Emidio S, Armeni M *et al*. The  
496 relationship between obesity and hypertension: an updated comprehensive overview  
497 on vicious twins. *Hypertens Res*. 2017;40: 947–963.
- 498 12. Frohlich ED, Messerli FH, Reisin E, Dunn FG. The problem of obesity and  
499 hypertension. *Hypertension* 1983;5:III71.

- 500 13. Mokdad AH, Ford ES, Bowman BA, Dietz WH, Vinicor F, Bales VS, et al.  
501 Prevalence of obesity, diabetes, and obesity-related health risk factors, 2001. *JAMA*.  
502 2003;289(1):76–9.
- 503 14. Must A, Spadano J, Coakley EH, Field AE, Colditz G, Dietz WH. The disease burden  
504 associated with overweight and obesity. *JAMA*. 1999;282(16):1523–9.
- 505 15. Natsis M, Antza C, Doundoulakis I, Stabouli S, Kotsis V. Hypertension in Obesity:  
506 Novel Insights. *Curr Hypertens Rev*. 2020;16(1):30-36.
- 507 16. Alidu H, Owiredu WKBA, Amidu N, Gyasi-Sarpong CK, Dapare PPM, Bawah AT, et  
508 al. Hypertension and obesity comorbidities increases coronary risk, affects domains of  
509 sexual function and sexual quality of life. *Int J Impot Res*. 2018;30(1):8-13.
- 510 17. Freisling H, Viallon V, Lennon H, Bagnardi V, Ricci C, Butterworth AS, et  
511 al. □Lifestyle factors and risk of multimorbidity of cancer and cardiometabolic  
512 diseases: a multinational cohort study. □*BMC Med*. 2020;18(1).
- 513 18. Haug N, Deischinger C, Gyimesi M, Kautzky-Willer A, Thurner, S Klimek, P. □High-  
514 risk multimorbidity patterns on the road to cardiovascular mortality. □*BMC*  
515 *Med*. □2020; □18(1): 44.
- 516 19. Jørgensen IF, Aguayo-Orozco A, Lademann M, Brunal, S. □Age-stratified  
517 longitudinal study of Alzheimer’s and vascular dementia patients. □*Alzheimer’s*  
518 *Dementia*. □2020; □16(6): 908–917.
- 519 20. Strauss VY, Jones PW, Kadam UT, Jordan, KP. Distinct trajectories of multimorbidity  
520 in primary care were identified using latent class growth analysis. □*J Clin*  
521 *Epidemiol*. □2014; □67(10): 1163–1171.
- 522 21. Gluckman PD, Buklijas T, Hanson MA. The developmental origins of health and  
523 disease (DOHaD) concept: Past, present, and future. In Rosenfeld CS, editor. *The*  
524 *Epigenome and Developmental Origins of Health and Disease*; 2016. pp. 1-15.

- 525 22. Harper S, Lynch J, Smith GD. Social determinants and the decline of cardiovascular  
526 diseases: understanding the links. *Annual Review of Public Health*. 2011;32:39-69.
- 527 23. Humphreys J, Jameson K, Cooper C, Dennison E. Early-life predictors of future  
528 multi-morbidity: results from the Hertfordshire Cohort. *Age Ageing*. 2018;47(3):474-  
529 478.
- 530 24. Johnston MC, Black C, Mercer SW, Prescott GJ, Crilly MA. Impact of educational  
531 attainment on the association between social class at birth and multimorbidity in  
532 middle age in the Aberdeen Children of the 1950s cohort study. *BMJ Open*.  
533 2019;9(1):e024048.
- 534 25. Gondek D, Bann D, Brown M, Hamer M, Sullivan A, Ploubidis GB. Prevalence and  
535 early-life determinants of mid-life multimorbidity: evidence from the 1970 British  
536 birth cohort. *BMC Public Health*. 2021;21(1):1319. doi: 10.1186/s12889-021-11291-  
537 w.
- 538 26. Stannard S, Berrington A, Paranjothy S, Owen RK, Fraser SDS, Hoyle RB, et al. A  
539 conceptual framework for characterising lifecourse determinants of multiple long-  
540 term condition multimorbidity. *Journal of Multimorbidity and Comorbidity*. 2023;13.
- 541 27. Stannard S, Berrington A, Fraser SDS, Paranjothy S, Hoyle RB, Owen RK, et al.  
542 Mapping domains of early life determinants of future multimorbidity across three UK  
543 longitudinal cohort studies. *Sci Rep*. **14**, 21454 (2024).
- 544 28. Fraser SDS, Stannard S, Holland E, Boniface M, Hoyle RB, Wilkinson R, et al.  
545 Multidisciplinary ecosystem to study lifecourse determinants and prevention of early-  
546 onset burdensome multimorbidity (MELD-B) – protocol for a research collaboration.  
547 *Journal of Multimorbidity and Comorbidity*. 2023;13.
- 548 29. Sullivan A, Brown M, Hamer M, Ploubidis G. Cohort Profile Update: The 1970  
549 British Cohort Study (BCS70). *International J Epidemiol*. 2022; dyac148.

- 550 30. Little RJA, Rubin DB. Statistical Analysis with Missing Data. 2nd edition. Hoboken,  
551 NJ: Wiley; 2002.
- 552 31. Horton NJ, Lipsitz SR. Multiple imputation in practice: comparison of software  
553 packages for regression models with missing variables. American Statistical  
554 Association. 2001; 55: 244–54.
- 555 32. Jakobsen JC, Gluud C, Wetterslev J. When and how should multiple imputation be  
556 used for handling missing data in randomised clinical trials—a practical guide with  
557 flowcharts. BMC Medical Research Methodology. 2017; 17: 162.
- 558 33. Collins LM, Schafer JL, Kam CM. A Comparison of inclusive and restrictive  
559 strategies in modern missing data procedures. Psychological Methods. 2001; 6: 330–  
560 351.
- 561 34. Mostafa T, Narayanan M, Pongiglione B. Improving the plausibility of the missing at  
562 random assumption in the 1958 British birth cohort: A pragmatic data driven  
563 approach. CLS working paper number 2020/6. UCL Centre for Longitudinal Studies.
- 564 35. Heinze G, Wallisch C, Dunkler D. Variable selection - A review and  
565 recommendations for the practicing statistician. Biometrical Journal. 2018; 60(3):  
566 431–449.
- 567 36. Atkinson, A.C. A note on the generalized information criterion for choice of a model.  
568 Biometrika. 1980;67, 413-418.
- 569 37. STATA - predict function. 2024. [https://www.stata.com/manuals13/p\\_predict.pdf](https://www.stata.com/manuals13/p_predict.pdf)
- 570 38. Alwan NA, Stannard S, Berrington A, Paranjothy S, Hoyle RB, Owen RK, et al. Risk  
571 factors for ill health: How do we specify what is ‘modifiable’? PLOS Glob Public  
572 Health. 2024; 4(3): e0002887.
- 573 39. Public Health Wales. First 1000 Days, Developing a Public Health Approach to  
574 Supporting Parents Technical Report. 2022.

- 575 [https://phw.nhs.wales/publications/publications1/developing-a-public-health-](https://phw.nhs.wales/publications/publications1/developing-a-public-health-approach-to-supporting-parents-technical-report/)
- 576 [approach-to-supporting-parents-technical-report/](https://phw.nhs.wales/publications/publications1/developing-a-public-health-approach-to-supporting-parents-technical-report/)
- 577 40. HM Government. The Best Start for Life. 2021.
- 578 [https://assets.publishing.service.gov.uk/media/605c5e61d3bf7f2f0d94183a/The\\_best](https://assets.publishing.service.gov.uk/media/605c5e61d3bf7f2f0d94183a/The_best_start_for_life_a_vision_for_the_1_001_critical_days.pdf)
- 579 [start\\_for\\_life\\_a\\_vision\\_for\\_the\\_1\\_001\\_critical\\_days.pdf](https://assets.publishing.service.gov.uk/media/605c5e61d3bf7f2f0d94183a/The_best_start_for_life_a_vision_for_the_1_001_critical_days.pdf)
- 580 41. Kalmijn M. Intergenerational transmission of health behaviors in a changing
- 581 demographic context: The case of smoking and alcohol consumption. Soc Sci
- 582 Med. 2022; 296: 114736.
- 583 42. The National Lottery Community Fund. A Better Start. 2015. [A Better Start | The](https://www.tnlcommunityfund.org.uk)
- 584 [National Lottery Community Fund \(tnlcommunityfund.org.uk\)](https://www.tnlcommunityfund.org.uk)
- 585 43. Department of Health and Social Care and the Department for Education. Family
- 586 Hubs and Start for Life Programme Guide. 2022. [Family Hubs and Start for Life](https://assets.publishing.service.gov.uk/government/uploads/system/uploads/attachment_data/file/114736/family-hubs-and-start-for-life-programme-guide.pdf)
- 587 [Programme Guide \(publishing.service.gov.uk\)](https://assets.publishing.service.gov.uk/government/uploads/system/uploads/attachment_data/file/114736/family-hubs-and-start-for-life-programme-guide.pdf)
- 588 44. Abstract from the 2024 Society for Social Medicine and Population Health Annual
- 589 Scientific Meeting. Stannard S, Berrington A, Fraser SDS, Hoyle RB, Paranjothy S,
- 590 Owen RK, et al. P03 Domains of early-life risk and obesity-hypertension
- 591 comorbidity: findings from two prospective birth cohorts. J Epidemiol Community
- 592 Health 2024;**78**:A48.
- 593 45. Lu H, Cole S, Platt R, Schisterman E. Revisiting Overadjustment Bias. Epidemiology.
- 594 2021; 32(5):p e22-e23.
- 595
